1 **Cannibalism as a feeding strategy for mantis shrimp**  
2 ***Oratosquilla oratoria* (De Haan, 1844) in the Tianjin**  
3 **coastal zone of Bohai Bay**

4  
5 **Qi-Kang Bo<sup>1</sup>, Yun-Zhao Lu<sup>1</sup>, Hui-Jing Mi<sup>1</sup>,**  
6 **Yan-Guang Yu<sup>1\*</sup>, De-Xian Gu<sup>2</sup>, Hong-Zheng You<sup>1</sup>,**  
7 **Shuang Hao<sup>3</sup>**

8 <sup>1</sup>Breeding Station of Bohai Sea Aquatic Resources, Tianjin Fisheries Research  
9 Institute

10 <sup>2</sup> Marine Resources and Ecology Research Department, Tianjin Fisheries Research  
11 Institute

12 <sup>3</sup> Aquatic Disease Research Department, Tianjin Fisheries Research Institute

13

14 \*Corresponding Author

15 E-mail: [yyg555999@163.com](mailto:yyg555999@163.com) (Y-G Y)

## 16 **Abstract**

17 A representative semi-enclosed bay of China, Bohai Bay has experienced severe  
18 interference in recent decades and is under threat from rapid human development.  
19 Although the mantis shrimp *Oratosquilla oratoria* plays an important role in the  
20 ecosystem and fishery, its feeding ecology and the impact of habitat changes on its  
21 feeding habits are poorly known. In this study, we sought to identify the prey  
22 consumed by *O. oratoria* through the separation of stomach contents and to describe  
23 its trophic ecology during maturation, from March to July, in the Tianjin coastal zone  
24 of Bohai Bay. A total of 594 specimens were collected and 347 (58.59%) stomachs  
25 were found to have food remains. More than half of the *O. oratoria* individuals had  
26 poor feeding activity, and the degree of feeding activity of females was higher than  
27 that of males, but there was no significant difference in the visual fullness index and  
28 the fullness weight index (FWI) between sexes for each month. And the feeding  
29 activities of *O. oratoria* were consistent over the study months. A total of 207 prey  
30 items yielded 231 readable sequences and 24 different taxa were identified. Prey  
31 detected in *O. oratoria* consisted mainly of crustaceans, which accounted for 71.86 %  
32 of the clones detected; 16.02% corresponded to fishes, 8.23% corresponded to  
33 mollusks and the remaining 3.90% corresponded to other marine organisms.  
34 Cannibalism (occured frequently, 69.08%) in this study was noticeably higher than  
35 that seen in previous studies and confirmed that cannibalism may be a significant  
36 feeding strategy in the mantis shrimp *O. oratoria* in the Tianjin coastal zone of Bohai  
37 Bay. The ecological environment in Bohai Bay has been affected by anthropogenic

38 activities and the macrofaunal biodiversity and abundance have noticeably declined,  
39 which might make the food scarce for the mantis shrimp *O. oratoria*. Then, the  
40 starvation obviously increased cannibalistic tendencies.

41

## 42 **Introduction**

43 The mantis shrimp, *Oratosquilla oratoria* (De Haan, 1844) (order Stomatopoda)  
44 is well known as a ferocious predator with its large and powerful raptorial appendages.  
45 It is a benthic, neritic and burrowing shrimp that is found on muddy bottoms in the  
46 coastal waters of Siberia, Korea, China, Japan, Vietnam, and Australia [1, 2]. It has  
47 become a commercially important species in these regions.

48 In Bohai Bay, the mantis shrimp is heavily caught by bottom-trawl and trammel  
49 nets, whose annual catches account for more than one-third of the crustacean catches  
50 in the past ten years [3]. A substantial decrease in the stock size of large female  
51 shrimps has been apparent since the fishing industry catch, in which larger individuals  
52 are overexploited, and the season of spawning fastigium is delayed to mid-to-latter of  
53 May, while some female shrimps also spawn into September [1, 4-6]. The abundance  
54 of mantis shrimp pseudozoaea is low before July [4, 6].

55 Few studies have focused on the feeding ecology of *O. oratoria*. Its trophic  
56 ecology in the coastal waters of the Chinese open sea, Huanghai Sea and Donghai Sea  
57 was described with crustaceans being the main prey group, followed by fishes and  
58 polychaetes [7, 8]. Hamano et al (1986) [9] found that mantis shrimp feed largely on  
59 Macrura and Pelecypoda in Hakata Bay of Japan. However, the diet of marine

60 organisms is affected by prey availability and the composition of marine life in the  
61 surrounding environment [9, 10]. In other distribution areas, such as Bohai Bay, their  
62 ecology is poorly known. Bohai Bay is a typical semi-enclosed bay situated in the  
63 western part of the largest inner sea of China, Bohai Sea which is located in northern  
64 China. As one of the most important marine fisheries and natural resource reserves in  
65 China, the ecological environment of Bohai Sea has always been of wide concern [11,  
66 12]. In Bohai Bay, mantis shrimp, a very intensive predator, is a principal component  
67 of the benthic megalofaunal community that consumes and transfers energy and  
68 biomass from the base of the web to higher levels [10, 13]. Moreover, an  
69 understanding of the trophic interactions between prey and predators is the foundation  
70 for effective management and protection of natural resources [14].

71 Intensive anthropogenic activities have been exerting tremendous stress on  
72 marine organisms, resulting in significant changes and deterioration in the structure of  
73 biological communities [11, 15]. The study area, the Tianjin coastal zone of Bohai  
74 Bay, has experienced rapid economic and technological development and  
75 anthropogenic activities such as terrigenous pollution, aquaculture, transportation and  
76 offshore oil exploration have caused serious impacts on the coastal environment [12,  
77 16]. However, how the impact of habitat changes on the feeding habits of a  
78 commercially important species, mantis shrimp, is unknown.

79 Artificial breeding of mantis shrimp has been explored, and the promotion of  
80 gonadal development has become a knotty technical problem in artificial cultures [17].  
81 In the absence of available formulated bait, the discovery of the feeding ecology

82 during gonad maturation will provide a reference for aquaculture and artificial  
83 breeding of this commercially important species.

84 Because of the importance of this species to the ecosystem and for fisheries, we  
85 sought to identify the prey consumed by *O. oratoria* through the separation of  
86 stomach contents, and to describe its trophic ecology during maturation in the Bohai  
87 Bay using the DNA barcoding method.

## 88 **Material and methods**

### 89 **Study area and samples acquisition**

90 Tianjin city is situated in the western part of Bohai Bay in China, and the study area  
91 was the Tianjin coastal zone (Fig 1). All the analyses have been carried out using  
92 frozen dead specimens of mantis shrimp collected from local fishermen from March  
93 to July 2018. Samples of *O. oratoria* were obtained from Bohai Bay by bottom trawls  
94 which were conducted by pleasure-boats that were converted from fishing boats, and  
95 on boats part of the catch was cooked on the spot for amusement and food; the rest of  
96 the catch was frozen and then distributed to tourists at the end of the tour. No use of  
97 live animals has been required for this study and no specific permissions were needed  
98 for the sampling activities in all of the investigated areas because our species of  
99 interest is commercially harvested (not endangered nor protected) and was caught in  
100 areas where fishing is allowed.

101

102 **Fig 1. The location of the sampling sites in the Tianjin coastal zone of Bohai Bay;**

103 **the marks show the sampling sites. Marks of each shape represent sampling sites**

104 **in different months.**

105

106 All specimens were brought to the laboratory where their stomach contents were  
107 removed. Each stomach was opened and the contents were flushed into cryogenic  
108 vials. The stomach contents, potential prey residue, were weighed and then preserved  
109 in 70% ethanol at -20°C for later DNA analysis. To avoid potential contaminants (e.g.,  
110 blood and tissue attached to the stomach from the predator), the exterior surface of  
111 each stomach was washed with sterile, distilled water before removing the stomach  
112 contents [18]. The total length (TL, from the base of the eyestalk to the anterior edge  
113 of the median notch of the telson) of the shrimps was measured to the nearest 1 mm,  
114 stomach content weight (SCW) and the total body weight (TW) were obtained to the  
115 nearest 0.001 g. This basic information and collection dates were showed in Table 1.

116 Feeding intensity during the study months was determined based on the degree of  
117 fullness of the stomach. A visual stomach fullness index was assigned to 5 levels: 0=  
118 empty, 1= scarce remains, 2= half full, 3= almost full, and 4= completely full [19].  
119 The mantis shrimp with stomachs at level 2 to 4 were considered to have been  
120 actively feeding, while stomach at 0 and 1 levels were considered to indicate poor  
121 feeding activity, and the percentages of shrimps with actively feeding (AF) and poor  
122 feeding activity (PFA) in both sexes for each month were calculated. The fullness  
123 weight indices ( $FWI = (SCW \times 1,000) / TW$ ) were calculated for all mantis shrimp with  
124 food remains [20].

125

126 **Table 1 The collection date, total length (TL), total weight (W), number (N) of *O.***  
127 ***oratoria* specimens and number of stomach content specimens (Nsc) obtained**  
128 **from the Tianjin coastal zone of Bohai Bay.**

| Date       | TL (cm)                  | W(g)                      | N   | Nsc |
|------------|--------------------------|---------------------------|-----|-----|
| 17-Mar     | 12.30±1.53 <sup>a</sup>  | 25.391±9.95 <sup>a</sup>  | 34  | 11  |
| 20-Apr     | 12.15±2.16 <sup>a</sup>  | 21.670±7.35 <sup>ab</sup> | 155 | 86  |
| 14-May     | 11.66±1.28 <sup>ab</sup> | 19.923±6.34 <sup>b</sup>  | 110 | 67  |
| 10, 25-Jun | 10.48±1.12 <sup>b</sup>  | 11.923±3.50 <sup>c</sup>  | 150 | 84  |
| 16, 29-Jul | 12.29±1.63 <sup>a</sup>  | 21.609±5.19 <sup>ab</sup> | 145 | 99  |

129 Data with different letters significantly differ ( $p < 0.05$ ) among months.

130

### 131 **DNA extraction and sequence acquisition**

132 Stomach contents were evenly ground in a homogenizer. Given few items and a  
133 large amount of silt in the stomach contents sample, genomic DNA was isolated using  
134 Soil Genome DNA Extraction Kit DP336 (TIANGEN BIOTECH, CO., LTD). A  
135 fragment of the *mitochondrial cytochrome oxidase I* (CO I) gene was amplified  
136 using the universal primers LCO1490-HC02198 [21] and if the concentration of  
137 amplification productions did not meet the sequencing requirements, then a  
138 semi-nested PCR using universal primers mlCOIintF-jgHCO2198 [22] was performed  
139 to increase the copies of prey DNA.

140 Each polymerase chain reaction (PCR) was carried out in 50- $\mu$ L volumes  
141 containing 2U Taq DNA polymerase (Takara Co.), approximately 20 ng template

142 DNA, 0.2 mM dNTPs, 0.25  $\mu$ M of each primer, 2.5 mM MgCl<sub>2</sub> and 1 $\times$ PCR buffer.  
143 The PCR amplification was performed on a GeneAmp® 9700 PCR System (Applied  
144 Biosystems). Cycling conditions consisted of an initial denaturation at 94°C for 3 min,  
145 followed by 35 cycles of: denaturation at 94°C for 1 min, annealing at 50°C (54°C for  
146 primers mICOIntF-jgHCO2198) for 30s, and extension at 72°C for 45s, and a final  
147 step of 5 min at 72°C. The semi-nested PCR was carried out using 1 $\mu$ L of the first  
148 PCR as a template.

149 Amplification products were confirmed by 1.5% TBE agarose gel  
150 electrophoresis stained with ethidium bromide. The cleaned product was prepared for  
151 sequencing using the BigDye Terminator Cycle Sequencing Kit (ver.3.1, Applied  
152 Biosystems) and sequenced bidirectionally using an ABI PRISM 3730 (Applied  
153 Biosystems) automatic sequencer. Obtained sequence producing mixed peak indicated  
154 that more than one prey species were present. Those PCR products were cloned using  
155 the TOPO TA Cloning Kit (Invitrogen). Eight colonies per sample were selected for  
156 colony PCR amplification and sequencing using the primers M13 (forward):  
157 GTAAAACGACGGCCAG, and M13 (reverse): CAGGAAACAGCTATGAC.

## 158 **DNA analyses**

159 All the obtained sequences were assembled and edited separately using DNASTAR  
160 software (DNASTAR, Inc.) and were then submitted and identified using the  
161 Identification System (IDS) in the Barcode of Life Database (BOLD,  
162 [www.boldsystems.org](http://www.boldsystems.org)) and the Basic Local Alignment Search Tool (BLAST) query  
163 algorithm in GenBank to establish whenever possible the identification of the ingested



164 material. The criteria to assign identification at the species level required that the  
165 sequence similarity display >98% in the BOLD database or in BLAST [23]. When a  
166 similar sequence match was not found in the DNA barcode reference library, we  
167 applied the method for visualization of a neighbor-joining tree and based our  
168 taxonomical assignments following the strict criteria proposed, and consist in nesting  
169 the “unknown” within a clade comprising of members of a single taxon [24]. The  
170 neighbor-joining tree was constructed using MEGA 6 software based on the Kimura  
171 2-parameter model [25] and bootstrap probabilities with 1,000 replications were  
172 calculated to assess reliability on each node of the tree.

### 173 **Statistical analysis**

174 To corroborate that the number of analyzed stomachs was adequate for diet  
175 description, a cumulative prey curve was generated using Estimate S Version 8.2  
176 based on the prey identified. The number of samples was assumed to be sufficient to  
177 describe the diet when the curve approached the asymptote [26]. Differences in mean  
178 TL and TW between months and in the FWI of males and females were compared  
179 using Student's t-test. To look for significant differences in FWI in different months  
180 for males and females, one-way analysis of variance (ANOVA) was conducted.  
181 Homogeneity of variance was examined for all data by using Bartlett-Box F and  
182 Cochran's C tests. In this study, the distribution of FWI values was not uniform for  
183 each month and the data did not meet the assumptions of normality and homogeneity  
184 of variances ( $P < 0.05$ ). Therefore, the FWI was transformed into a log (x) scale to  
185 normalize and homogenize the variances [27]. The distribution differences of AF and

186 PAF between sexes were verified by the Chi-squared fit test ( $\chi^2$ ). Statistical analyses  
187 were performed using IBM SPSS statistics version 19 (IBM, Chicago, IL, USA). The  
188 frequency of occurrence of each prey was calculated as the percentage of stomachs in  
189 which the prey occurred in any given sample. The number (%N) was calculated as the  
190 number of a certain prey type relative to the total numbers of prey.

## 191 **Results**

### 192 **Feeding intensity**

193 A total of 594 specimens were collected and 347 stomachs (58.59% of total  
194 stomachs) were found to have food remains. More than half of the stomachs were  
195 found to have low index values (the mean proportion of PAF in females was 68.86%,  
196 and in males was 75.71%). Although the analysis of the Chi-squared fit test show that  
197 there was no significant difference in the visual fullness index between sexes ( $P>0.05$ ),  
198 the AF proportions of females were larger than those of males except in June (Fig 2).

199

200

201 **Fig 2. Monthly variation in fullness degree of stomachs of *O. oratoria* for each**  
202 **month. The first column shows data for females and the second column shows**  
203 **data for males.**

204

205 From March to July, most FWI values for the females ranged from 1.54 to 7.52 (Fig  
206 3a) which were larger than those for males, from 1.49 to 4.83 (Fig 3b), but no  
207 difference was found in the FWI between sexes for each month or between months for

208 each sex, after comparison with the transformed data ( $P>0.05$ ).

209

210 **Fig 3. Box-plots of the fullness weight index (FWI) of the females (a) and males**  
211 **(b) in different months. Boxes show lower and upper quartiles with medians**  
212 **(lines) inside the boxes.**

213

### 214 **Molecular prey identification**

215 For 347 prey items obtained, about 95% contained a few items and a large amount  
216 of silt. Except for a large number of exopods or endopods remains of pleopods of  
217 mantis shrimps and a small amount of skeletal fragments from fish, there was no hard  
218 skeletal material in the stomach contents. All prey tissue fragments were barcoded,  
219 and 207 prey items yielded 231 readable sequences. The sequences were compared to  
220 the sequences of the reference library, and 90.91% matched with greater than 98%  
221 similarity to the reference sequences, allowing identification to the species level. The  
222 remaining 9.09% (21 clones) could be identified only to the genus, family or order  
223 level (Table 2). Of the 21 clones, only one clone showed more than a 95% similarity  
224 to reference sequences, while the remainder showed similarities between 82 and 91%.  
225 A total of 24 different taxa were identified. The representative sequences were  
226 submitted to GenBank (submission ID is: 2250197) and also submitted as Supporting  
227 information (S1 File).

228

229



231 **Table 2. Prey detected in *O. oratoria* stomachs from Bohai Bay by cloning the CO I fragment gene, including GenBank Accession**  
 232 **numbers or Sequence IDs of closest matches, percentages of similarity obtained from BLAST and BOLD, prey taxa and their monthly**  
 233 **frequencies.**

| Order           | Family          | species                             | Similarity % | Ac. Number or<br>Seq. ID | Frequence |      |     |      |      |
|-----------------|-----------------|-------------------------------------|--------------|--------------------------|-----------|------|-----|------|------|
|                 |                 |                                     |              |                          | Mar.      | Apr. | May | Jun. | Jul. |
| Gobiiformes     | Oxudercidae     | <i>Chaeturichthys stigmatias</i>    | 100          | KV199164                 | 1         | 2    | 11  | 10   | 6    |
| Gobiiformes     | Oxudercidae     | <i>Odontamblyopus rubicundus</i>    | >98          | AF391371                 |           |      |     | 2    | 1    |
| Gobiiformes     | Oxudercidae     | <i>Amblychaeturichthys hexanema</i> | 98.6         | GU479054                 |           | 1    |     |      |      |
| Clupeiformes    | Clupeidae       | <i>Konosirus punctatus</i>          | 99.28        | JQ753955                 |           |      |     |      | 1    |
| Clupeiformes    | Engraulidae     | <i>Thyssa kammalensis</i>           | 98.12        | KU360510                 |           |      |     |      | 1    |
| Scorpaeniformes | Platycephalidae | <i>Platycephalus indicus</i>        | 98.1         | JN885883                 |           | 1    |     |      |      |
| Stomatopoda     | Squillidae      | <i>Oratosquilla oratoria</i>        | >99          | KP976321                 | 7         | 47   | 29  | 29   | 31   |
| Mysida          | Mysidae         | No match found                      |              |                          |           | 3    | 6   | 2    | 2    |

|                 |               |                                |       |             |   |   |   |   |   |
|-----------------|---------------|--------------------------------|-------|-------------|---|---|---|---|---|
| Decapoda        | Hippolytidae  | No match found                 |       |             |   | 1 |   |   |   |
| Decapoda        | Alpheidae     | <i>Alpheus distinguendus</i>   | 98.39 | GQ892049    |   |   |   |   | 1 |
| Decapoda        | Dorippidae    | <i>Heikea arachnoides</i>      | 99.27 | EU636976    |   |   |   |   | 2 |
| Decapoda        | Porcellanidae | No match found                 |       |             |   |   |   |   | 1 |
| Decapoda        | Upogebiidae   | Austinogebia                   | 95.61 | LC006054    |   |   | 1 |   |   |
| Decapoda        | Varunidae     | No match found                 |       |             |   |   |   |   | 3 |
| Amphipoda       | Amphipoda     | No match found                 |       |             |   |   | 1 |   |   |
| Myopsida        | Loliginidae   | <i>Loliolus beka</i>           | >99   | HQ529504    |   |   | 3 | 1 | 8 |
| Octopoda        | Octopodidae   | <i>Octopus minor</i>           | 99.55 | MF029677    | 2 |   |   |   |   |
| Littorinimorpha | Naticidae     | <i>Neverita didyma</i>         | 99.51 | JF693398    |   |   |   | 1 |   |
| Venerida        | Veneridae     | <i>Venerupis philippinarum</i> | 98.66 | JF693398    |   |   | 2 |   |   |
| Myida           | Corbulidae    | <i>Corbula amurensis</i>       | 99.39 | KJ522938    |   |   |   |   | 2 |
| Phyllodocida    | Glyceridae    | <i>Glycera chirori</i>         | 99.05 | HZPLY772-13 | 1 |   | 1 |   |   |

|                   |                    |                                 |       |          |    |    |    |    |    |
|-------------------|--------------------|---------------------------------|-------|----------|----|----|----|----|----|
| Aphragmophora     | Sagittidae         | <i>Sagitta crassa</i>           | 99.14 | HQ700947 |    |    | 1  |    |    |
| Calanoida         | Acartiidae         | <i>Acartia bifilosa</i>         | 98.86 | EU599508 |    |    | 2  | 3  |    |
| Rhabditida        | Rhaphidascarididae | <i>Hysterothylacium aduncum</i> | 98.13 | FJ907319 |    |    |    | 1  |    |
| Total             |                    |                                 |       |          | 11 | 58 | 56 | 47 | 59 |
| Number of species |                    |                                 |       |          | 4  | 6  | 10 | 8  | 12 |

234

235

236

237 Through nesting the “unknown” clones within a clade comprising of members of a  
238 single taxon in the neighbor-joining tree, three crustacean orders were identified:  
239 Mysida with 13 samples that belong to Mysidae; Amphipoda with one sample; and  
240 Decapoda with all remaining matches. Among the Decapoda, one specimen matched  
241 the genus *Austinogebia*, one matched to Hippolytidae, one matched to Porcellanidae  
242 and three matched to Varunidae (Fig 4).

243

244 **Fig 4. Neighbor-joining tree for 6 clades representing crustaceans in the stomach**  
245 **contents of the mantis shrimp. Each clade comprises of members of a single**  
246 **taxon and the “unknown” clones (bold font) were nested within a clade.**

247

248 In summarising, prey detected in *O. oratoria* consisted mainly of crustaceans that  
249 accounted for 71.86 % of the clones detected, 16.02% corresponded to fishes, 8.23%  
250 corresponded to mollusks and the remaining 3.90% corresponded to other marine  
251 organisms. Fifteen orders were identified in *O. oratoria* stomachs and the number of  
252 diet species tended to increase from April to July. Six orders, each of which  
253 constituted more than 2% of the sequencing reads, accounted for 92.21% of the clones  
254 (Fig 5). Stomatopoda accounted for the highest proportion, 61.90%, followed by  
255 Gobiiformes (14.72%) and Mysida (5.63%).

256

257 **Fig 5. Rank abundance of orders of prey organisms detected in the stomach of O.**



258 **oratoria. The y-axis shows the percentage of total reads that each taxonomic**  
259 **order contributed. The x-axis shows the prey orders that constituted more than 2%**  
260 **of the sequencing reads.**

261

262 The cumulative prey curve shows that 207 stomachs were adequate to describe the  
263 diet of this species. The slopes of the saturation curves rapidly approached the  
264 asymptotes, indicating that sufficient sequencing reads were generated to capture  
265 major prey items and trends towards capturing full taxon richness (Fig 6).

266

267 **Fig 6. The species-accumulation curves of diet detected in 207 mantis shrimp**  
268 **stomachs. The asymptote represents 24 taxa.**

## 269 **Cannibalism**

270 When considering the importance of these groups in the diet of *O. oratoria*, it is  
271 remarkable that its own species was the most common prey species, detected in 143  
272 out of 207 stomachs, accounting for 69.08% (Table 2). This study confirmed that the  
273 mantis shrimp *O. oratoria* was a cannibalistic predator in Bohai Bay. Although  
274 significance test of regression coefficients of linear ( $R^2=0.469$ ,  $P=0.201$ ) and  
275 curvilinear regression ( $R^2=0.560$ ,  $P=0.167$ ) were not significant, the degree of  
276 cannibalism decreased with an increase in diet species (Fig 7).

277

278 **Fig 7. Relationship between cannibalism events and diet species; data were**  
279 **counted once a month.**

## 280 **Discussion**

281 Although the first peak of the gonadosomatic index in *O. oratoria* and spawning of  
282 large females were observed in spring [4], the first maturity fastigium of *O. oratoria*  
283 was found in mid-to-late May in northern China because of the overexploitation of  
284 larger individuals [1, 4-7], where a peak in lipid and protein levels in ovaries was  
285 observed in May [1]. The overexploitation of larger individuals also delayed the  
286 appearance of *O. oratoria* pseudozoea [6]. In this study, we were interested in the five  
287 months from March to July, when mantis shrimps attain gonadal maturity and then  
288 spawn. It is well known that the nutritional status of crustacean broodstock can  
289 markedly affect ovarian maturation and reproductive performance, as well as egg and  
290 offspring quality [28, 29]. Thus, investigation of the change mechanisms of the  
291 feeding strategy due to the conversion of nutrients in the body during this special  
292 period is of more research value.

293 An increase in the biosynthesis of various proteins, including hormones, enzymes,  
294 and lipoproteins, is involved in gonadal maturation [1, 30]. Mantis shrimps produce  
295 large numbers of yolk-laden eggs, where vitellogenesis, the process of yolk formation,  
296 is central to oogenesis [1]. It was generally thought that because of the fast energy  
297 supplement for gametogenesis from recently ingested energy, especially for females,  
298 there was an obvious peak in the feeding intensity during gonadal maturity at the end  
299 of spring [7, 8]. However, the results showed that no significant differences were  
300 found in the visual fullness index and in the FWI, suggesting that the feeding activity  
301 of *O. oratoria* was consistent between sexes and across the months and there was no

302 obvious peak in feeding intensity. Yan et al (2017) [1] found that the beginning of  
303 reproduction of *O. oratoria* was related to reproductive effort, defined as the  
304 proportion of body energy transferred to reproduction. Their research results showed  
305 that, in both sexes, lipid contents and protein levels in the hepatopancreas and muscle  
306 decreased before May in accordance with the peak in lipid contents and protein levels  
307 in the gonads, suggesting *O. oratoria* was a conservative species, whose energy for  
308 gametogenesis comes from substrates stored in various organs and tissues (muscle,  
309 digestive gland, and mantle) through feeding prior to gametogenesis [31].  
310 Mobilization of energy from the hepatopancreas to the gonads during periods of high  
311 energy demand is also found in other species of crustaceans [32, 33]. Compared to the  
312 opportunistic species whose energy for gametogenesis comes from recently ingested  
313 energy, the feeding intensity of conservative species tends to be stable. In view of  
314 these research conclusions, it is reasonable that the feeding activity of *O. oratoria* was  
315 consistent between sexes and no obvious peak in feeding intensity occurred prior to  
316 gonadal maturity.

317 Mantis shrimp are carnivorous and active predators and cannibalism occurs when  
318 large adults feed on small individuals [9]. The pleopods remains of mantis shrimps  
319 were frequently identified from stomachs and cannibalism occurred frequently  
320 (69.08%) in the result from this study and was much higher than that of the previous  
321 studies. The diets of *O. oratoria* in open seas, the Huanghai Sea and the Donghai Sea,  
322 were studied and it was found that cannibalism occurred incidentally at average value  
323 of 2.55% and 1.1% respectively [7, 8]. Hamano and Matsuura (1986) [9] found

324 cannibalism occurred in only 0.7% of individuals when they studied the food habits of  
325 the mantis shrimp in Hakata Bay, Japan. The frequency of occurrence of mantis  
326 shrimp in stomachs remains is so high and the disparities between this study area and  
327 other areas are so great that it is necessary to think of cannibalism as a significant  
328 feeding strategy in the Tianjin coastal zone of Bohai Bay. It is thus assumed that  
329 cannibalism is part of a population energy storage strategy that enables mantis  
330 shrimps populations to react environmental conditions by reducing their numbers [34,  
331 35].

332 Cannibalism is mainly and frequently a response to density or food in the field [34,  
333 35]. The mechanism of density affecting cannibalism is that when population density  
334 increases, the territories must decrease and subsequently the frequency of  
335 intra-specific encounters and the rate of cannibalism increases [35, 36]. However,  
336 dramatic increases in the demand for stomatopods has recently led to overfishing and  
337 in the Bohai Bay, the mantis shrimp has been one of main fishing targets for  
338 crustacean fishing and is heavily caught by bottom-trawl and trammel nets. The wild  
339 stocks of *O. oratoria* have been seriously damaged [1, 5-7]. Its annual catches have  
340 decreased in the last ten years, from 1769 tons in 2007 to 510 tons in 2017 with a  
341 71.17% drop (Fig 8) [3]. This means that the per capita area increased by nearly 2.5  
342 times in the past 10 years and it is thus thought the density has limited influence on  
343 cannibalism in the study area.

344

345 **Fig 8. The annual catches of mantis shrimp *O. oratoria* and their proportion in**

346 **crustacean catches from 2007 to 2017.**

347

348 Starvation obviously increases cannibalistic tendencies [35, 37]. The mean FWI for  
349 each month ranged from 3.04 to 4.68 in this study, which is smaller than that for other  
350 waters, where the range was from 4.64 to 9.95 [7]. Additionally, the percentage of  
351 empty stomachs ranged from 28% to 65% from April to July, and was significantly  
352 greater than those of Sheng et al (2009) [7], from 4% to 20% and Xu et al (1996) [8],  
353 from 9.7% to 49%. All comparisons indicate that the mantis shrimp *O. oratoria* in the  
354 Tianjin coastal zone of Bohai Bay was suffering some degree of starvation. Under  
355 starvation, larger specimens feed on smaller conspecifics for direct food supply [34,  
356 36] and cannibalism could provide the necessary mortality to stabilize a population  
357 during adverse conditions. A starving population with a high cannibalistic rate could  
358 have a greater chance to have an environment of sufficient production and secure  
359 reproduction [35, 38]. Moreover, cannibalism can also provide a mechanism for  
360 survival of at least parts of a population [39] as it reduces competition for the limited  
361 resources [35, 37]. The population can access lower trophic levels with the indirect  
362 extension of the food size spectrum [34] when smaller conspecifics are consumed  
363 [36].

364 Cannibalistic behavior has been suggested to be an indicator of limited food  
365 availability [34, 35]. The percentage of cannibalism decreased with the increase in  
366 diet species in this study (Fig 7). The study area had considerably lower biodiversity  
367 and abundance levels of macrobenthos than two other sites, the Jiaozhou Bay and the

368 Zhoushan area of Donghai Sea [7, 8], where the diets of mantis shrimps were studied.

369 The survey data of the macrobenthic community were obtained as closely as possible

370 to the times when the mantis shrimps were sampled in previous studies, as listed in

371 Table 3. The Tianjin coastal zone of Bohai Bay has experienced rapid economic and

372 technological development and in recent years, it has also been subjected to intensive

373 offshore exploration for production of natural gas and petroleum reserves. In addition,

374 each year approximates 50% of China's total maritime discharge of pollutants are

375 brought into the sea by the river runoff. The warning of “dead sea” had drawn great

376 concern to the Chinese government and agency [40]. The ecological environment has

377 been affected by anthropogenic activities and these habitat changes have had a

378 significant impact on macrobenthic communities [16, 40]. The number of

379 macrobenthic species in this area has obviously declined compared with the historical

380 data in 1980s, from 104.5 species to 29 species with a 72.24% species drop [40]. The

381 average abundance of macrofauna was dramatically lower than it was ten years ago

382 with an 86.07% drop (Table 3), and the dominant species in Bohai Bay showed a

383 miniaturization trend where the traditionally dominant large-sized species were

384 replaced by small-sized species, such as polychaetes and crustaceans[41, 42]. All of

385 these changes possibly made the food for the mantis shrimp *O. oratoria* more scarce.

386 However, there is a need for more studies to reach conclusions on how the impact of

387 habitat changes the feeding habits of commercially important species, such as mantis

388 shrimp.

389

390 **Table 3 Number of species and average abundance of macrobenthos at three**  
 391 **sites where the feeding behavior of mantis shrimp *O. oratoria* was studied. The**  
 392 **survey data of the macrobenthic community were obtained as closely as possible**  
 393 **to the times when mantis shrimp was sampled in previous studies.**

| Sea area                                   | Year      | season               | Number<br>of<br>species | Abundance<br>(ind/m <sup>2</sup> ) | Sources |
|--------------------------------------------|-----------|----------------------|-------------------------|------------------------------------|---------|
| Tianjin<br>coastal zone<br>of Bohai<br>Bay | 2004      | Summer               | 29                      | 402.8                              | [43]    |
|                                            | 2007      | Summer               | 36                      | 120.27                             |         |
|                                            | 2014      | Summer and<br>autumn | 29                      | 56.07                              | [40]    |
| Jiaozhou<br>Bay                            | 2015-2017 | Except<br>winter     | 191                     | 459.4                              | [44]    |
| Zhoushan<br>area of<br>Donghai Sea         | 2009      | Spring               | 84                      | 208.5                              | [45]    |

394

395 The results showing that feeding activity of *O. oratoria*, a conservative species, are  
 396 consistent over the months provides a reference for artificial breeding of this  
 397 commercially important species that except for maintaining their normal food, the  
 398 accessional diet supplied to the females bloodstocks is not a great concern because of  
 399 the short culture time between collection from the wild and spawning. However what

400 should be taken into account is that the high stocking density of broodstock would  
401 likely cause stress responses because the frequently cannibalistic behavior in the wild  
402 makes *O. oratoria* extremely sensitive to density and the stress responses would  
403 degenerate the gonads [46]. The results also provide the trophic relationship  
404 information for fishery management and restoration of biodiversity and the abundance  
405 level of macrobenthos in Bohai Bay can improve feeding conditions for mantis  
406 shrimp, then increasing its production, because the mantis shrimp could minimize  
407 their energy expenditure when they captured and handled smaller organisms, rather  
408 than preying on their own kind with harder exoskeletons and a more formidable  
409 defensive weapon, the raptorial claw [9].

## 410 **Supporting information**

411 **S1 File. The representative sequences detected in stomach contents.**

412 (PDF)

413

## 414 **Acknowledgments**

415 We are indebted to deputy senior engineer Zhen-Guo Zhang and Zhang Luo for  
416 their kind assistance in molecular experiments and to intermediate engineer J Yu for  
417 her kind assistance in specimen collection. We also thank American Journal Experts  
418 (AJE) for English language editing.

419

420

421



## 422 Reference

- 423 1. Yan H, Xue M, Liu H, Wang L, Liu Q, Jiang L. Energy reserves and gonad steroid  
424 levels during the reproductive cycle of the Japanese mantis shrimp *Oratosquilla*  
425 *oratoria* De Haan, 1844 (Stomatopoda: Squillidae) in Pikou Bay, Dalian, China.  
426 Journal of Crustacean Biology. 2017; 37:99-108.  
427 <https://doi.org/10.1093/jcbiol/ruw016>
- 428 2. Kodama K, Shiraishi H, Morita M, Horiguchi T. Reproductive biology of the  
429 Japanese mantis shrimp *Oratosquilla oratoria* (Crustacea Stomatopoda): annual  
430 cycle of gonadal development and copulation. Marine Biology Research. 2009; 5:  
431 415-426. <https://doi.org/10.1080/17451000802644714>
- 432 3. National Bureau of Statistics of China. China Statistical Yearbook. Beijing:  
433 Statistics Press; 2008-2018.
- 434 4. Kodama K, Shimizu T, Yamakawa T, Aoki I. Reproductive biology of the female  
435 Japanese mantis shrimp *Oratosquilla oratoria* (Stomatopoda) in relation to  
436 changes in the seasonal pattern of larval occurrence in Tokyo Bay, Japan.  
437 Fisheries science. 2004; 70:734-745.  
438 <https://doi.org/10.1111/j.1444-2906.2004.00866.x>
- 439 5. Lin YJ, Liu HY, Xu HL, Gu DX. Morphometry of mantis shrimp *Oratosquilla*  
440 *oratoria* in Dalian coast. Journal of Dalian Fisheries University. 2008;  
441 23:215-217. <https://doi.org/10.16535/j.cnki.dlhyxb.2008.03.012>
- 442 6. Gu DX, Wang T, Wang N, Wang G, You HZ, Li WW, Liu GS. Distribution and  
443 affecting factors of pseudozoea density of mantis shrimp *Oratosquilla oratoria*

- 444 in Bohai Bay. Journal of Dalian Fisheries University. 2018; 1:65-71.  
445 <https://doi.org/10.16535/j.cnki.dlhyxb.2018.01.011>
- 446 7. Sheng FL, Zeng XQ, Xue Y. Study on propagation and feeding habits of  
447 *Otatosquilla oratoria* in the inshore waters of Qingdao. Periodical of Ocean  
448 University of China. 2009; 39:326-332.  
449 <https://doi.org/110.16441/j.cnki.hdxh.2009.s1.059>
- 450 8. Xu SL, Wang CL, Mei WX, Bao BL. Preliminary study on propagation and feeding  
451 habits of *Oratisquilla oratoria* in northern Zhejiang sea areas. Journal of  
452 Zhejiang college of fisheries. 1996; 1:30-36.
- 453 9. Hamano T, Matsuura S. Food habits of the Japanese mantis shrimp in the benthic  
454 community of Hakata Bay. Nippon Suisan Gakkaishi. 1986; 52:787-794.  
455 <https://doi.org/10.2331/suisan.52.787>
- 456 10. Cortez T, Castro BG, Guerra A. Feeding dynamics of *Octopus mimus* (Mollusca:  
457 Cephalopoda) in northern Chile waters. Marine Biology. 1995; 123: 497-503.  
458 <https://doi.org/10.1007/BF00349228>
- 459 11. Hu G, Zhang Q. Seasonal variations in macrobenthic taxonomic diversity and the  
460 application of taxonomic distinctness indices in Bohai Bay, northern China.  
461 Ecological Indicators. 2016; 71:181-190.  
462 <https://doi.org/10.1016/j.ecolind.2016.07.001>
- 463 12. Ni D, Zhang Z, Liu X. Benthic ecological quality assessment of the Bohai Sea,  
464 China using marine biotic indices. Marine pollution bulletin. 2019; 142:457-464.  
465 <https://doi.org/10.1016/j.marpolbul.2019.03.055>

- 466 13. Ning JJ, Du FY, Wang XH, Gu YG, Wang LG, Li YF. Feeding habits of mantis  
467 shrimp based on stable isotope analysis. *Journal of fisheries of China*. 2016;  
468 6:903-910. <https://doi.org/10.11964/jfc.20151110177>
- 469 14. Essington, TE, Baskett, ML, Sanchirico, JN, Walters, C. A novel model of  
470 predator-prey interactions reveals the sensitivity of forage fish: Piscivore fishery  
471 trade-offs to ecological conditions. *ICES Journal of Marine Science*. 2015;  
472 72:1349-1358. <https://doi.org/10.1093/icesjms/fsu242>
- 473 15. Qiao Y, Feng J, Cui S, Zhu L. Long-term changes in nutrients, chlorophyll a and  
474 their relationships in a semi-enclosed eutrophic ecosystem, Bohai Bay, China.  
475 *Marine pollution bulletin*. 2017; 117:222-228.  
476 <https://doi.org/10.1016/j.marpolbul.2017.02.002>
- 477 16. Zhang Q, Warwick RM, McNeill CL, Widdicombe CE, Sheehan A, Widdicombe  
478 S. An unusually large phytoplankton spring bloom drives rapid changes in  
479 benthic diversity and ecosystem function. *Progress in oceanography*. 2015;  
480 137:533-545. <https://doi.org/10.1016/j.pocean.2015.04.029>
- 481 17. Wang C, Xu J, Li D, Jiang X, Jiang J. Study on techniques of breeding in earthen  
482 ponds and intermediate rearing of *Oratosquilla kempfi*. *Fisheries Science*. 2004;  
483 23(2):22-25. <https://doi.org/10.16378/j.cnki.1003-1111.2004.02.007>
- 484 18. Carreon-Martinez L, Heath DD. Revolution in food web analysis and trophic  
485 ecology: diet analysis by DNA and stable isotope analysis. *Molecular Ecology*.  
486 2010; 19: 25-27. <https://doi.org/10.1111/j.1365-294X.2009.04412.x>
- 487 19. Breiby A, Jobling M. Predatory role of the flying squid *Todarodes sagittatus* in

- 488 North Norwegian waters. NAFO Scientific Council Studies. 1985; 9: 125-132.
- 489 20. Rasero M, González AF, Castro BG, Guerra A. Predatory relationships of two  
490 sympatric squid *Todaropsis eblanae* and *Illex coindetii* (Cephalopoda:  
491 Ommastrephidae) in Galician waters. Journal of the Marine Biological  
492 Association of the United Kingdom. 1996; 76:73-87.  
493 <https://doi.org/10.1017/S0025315400029027>
- 494 21. Folmer O, Black M, Hoeh W, Lutz R, Vrijenhoek R. DNA primers for  
495 amplification of mitochondrial cytochrome c oxidase subunit I from diverse  
496 metazoan invertebrates. Molecular Marine Biology and Biotechnology. 1994;  
497 3:294-299.
- 498 22. Leray M, Yang JY, Meyer CP, Mills SC, Agudelo N, Ranwez V, et al. A new  
499 versatile primer set targeting a short fragment of the mitochondrial COI region  
500 for metabarcoding metazoan diversity: application for characterizing coral reef  
501 fish gut contents. Frontiers in zoology. 2013; 10:34.  
502 <https://doi.org/10.1186/1742-9994-10-34>
- 503 23. Roura Á, González ÁF, Redd K, Guerra Á. Molecular prey identification in wild  
504 *Octopus vulgaris* paralarvae. Marine Biology. 2012; 159:1335-1345.  
505 <https://doi.org/10.1007/s00227-012-1914-9>
- 506 24. Valdez-Moreno M, Quintal-Lizama C, Gómez-Lozano R, del Carmen  
507 García-Rivas M. Monitoring an alien invasion: DNA barcoding and the  
508 identification of lionfish and their prey on coral reefs of the Mexican Caribbean.  
509 PloS one. 2012; 7:e36636. <https://doi.org/10.1371/journal.pone.0036636>

- 510 25. Tamura K, Stecher G, Peterson D, Filipski A, Kumar S. MEGA6: molecular  
511 evolutionary genetics analysis version 6.0. *Molecular biology and evolution*.  
512 2013; 30: 2725-2729. <https://doi.org/10.1093/molbev/mst197>
- 513 26. Colwell RK. Estimates: statistical estimation of species richness and shared  
514 species from samples. Version 8.2. 2009; Available from:  
515 <http://www.purl.oclc.org/estimates>.
- 516 27. Nunes AJ, Parsons GJ. Size-related feeding and gastric evacuation measurements  
517 for the Southern brown shrimp *Penaeus subtilis*. *Aquaculture*. (2000);  
518 187:133-151. [https://doi.org/10.1016/S0044-8486\(99\)00386-5](https://doi.org/10.1016/S0044-8486(99)00386-5)
- 519 28. Wouters R, Piguave X, Bastidas L, Caldéron J and Sorgeloos P. Ovarian  
520 maturation and hemolymphatic vitellogenin concentration of Pacific white  
521 shrimp *Litopenaeus vannamei* (Boone) fed increasing levels of total dietary  
522 lipids and HUFA. *Aquaculture Research*. 2001; 32:573-582.  
523 <https://doi.org/10.1046/j.1365-2109.2001.00580.x>
- 524 29. Wu X, Cheng Y, Zeng C, Sui L, Southgate PC, Zhou G, et al. Reproductive  
525 performance and offspring quality of Chinese mitten crab *Eriocheir sinensis* (H.  
526 Milne-Edwards) females fed an optimized formulated diet and the razor clam  
527 *Sinonovacula constricta*. *Aquaculture Research*. 2009; 40:1335-1349.
- 528 30. Yehezkel G, Chayoth R, Abdu U, Khalaila I, Sagi A. High-density lipoprotein  
529 associated with secondary vitellogenesis in the haemolymph of the crayfish  
530 *Cherax quadricarinatus*. *Comparative Biochemistry and Physiology B*, 2000;  
531 127:411-421. [https://doi.org/10.1016/S0305-0491\(00\)00270-4](https://doi.org/10.1016/S0305-0491(00)00270-4)

- 532 31. Li Q, Liu W, Shirasu K, Chen W, Jiang S. Reproductive cycle and biochemical  
533 composition of the Zhe oyster *Crassostrea plicatula* Gmelin in an eastern coastal  
534 bay of China. *Aquaculture*. 2006; 261:752-759.  
535 <https://doi.org/10.1016/j.aquaculture.2006.08.023>
- 536 32. Vinagre AS, Amaral APN, Ribarcki FP, Silveira EF, Périco E. Seasonal variation  
537 of energy metabolism in ghost crab *Ocypode quadrata* at Siriú Beach (Brazil).  
538 *Comparative Biochemistry and Physiology A*. 2007; 146:514-519.  
539 <https://doi.org/10.1016/j.cbpa.2006.02.004>
- 540 33. Fatima H, Ayub Z, Ali SA, Siddiqui G. Biochemical composition of the  
541 hemolymph, hepatopancreas, ovary, and muscle during ovarian maturation in the  
542 penaeid shrimps *Fenneropenaeus merguensis* and *F. penicillatus* (Crustacea:  
543 Decapoda). *Turkish Journal of Zoology*. 2013; 37:334-347.  
544 <https://doi.org/10.3906/zoo-1201-12>
- 545 34. Fox LR. Cannibalism in natural populations. *Annual review of ecology and*  
546 *systematic*. 1975; 6:87-106.  
547 <https://doi.org/10.1146/annurev.es.06.110175.000511>
- 548 35. Ibáñez CM, Keyl F. Cannibalism in cephalopods. *Reviews in Fish Biology and*  
549 *Fisheries*. 2010; 20:123-136. <https://doi.org/10.1007/s11160-009-9129-y>
- 550 36. Abdussamad EM, Thampy DM. Cannibalism in the tiger shrimp *Penaeus*  
551 *monodon* Fabricius in nursery rearing phase. *Journal of Aquaculture in the*  
552 *Tropics*: 1994; 9:67-75.
- 553 37. Polis GA. The evolution and dynamics of intra-specific predation. *Ann Rev Syst*

- 554       Evol. 1981; 12:225-251. <https://doi.org/10.1146/annurev.es.12.110181.001301>
- 555   38. Keyl F, Arguñelles J, María-tegui L, Tafur R, Wolff M, Yamashiro C. A  
556       hypothesis on range expansion and spatio-temporal shifts in size-at-maturity of  
557       jumbo squid (*Dosidicus gigas*) in the eastern Pacific Ocean. Cal COFI Rep. 2008;  
558       49:119-128
- 559   39. O'Dor RK, Wells MJ. Energy and nutrient flow. In: Boyle PR editor. Cephalopod  
560       life cycles: comparative reviews. London: Academic Press, 1987. pp 109-133.
- 561   40. Zhang P, Jiao JH, Sun WS, Li T, Ye HM. Community structure and secondary  
562       production of macrobenthos in Tianjin coastal seawaters in Bohai Bay. Journal  
563       of Dalian Ocean University. 2016; 3:324-330.  
564       <https://doi.org/10.16535/j.cnki.dlhyxb.2016.03.017>
- 565   41. Liu XS, Fan Y, Shi SJ, Hua E, Zhan ZN. Studies on the species composition and  
566       community structure of macrofauna in the Bohai Sea, China. Acta oceanologica  
567       Sinica (in Chinese), 2011; 36:53-66. [https://doi.org/10.](https://doi.org/10.3969/j.issn.0253-4193.2014.12.005)  
568       3969/j.issn.0253-4193.2014.12.005
- 569   42. Bi H, Sun S, Sun D. Changes of macrobenthic communities in Jiaozhou Bay.  
570       Oceanologia et Limnologia Sinica. 2001; 32:132-138.
- 571   43. Feng JF, Wang XM, Meng WQ, Li HY, Zhu L. Variation characteristics of  
572       macrobenthic communities structure in tianjin coastal region in summer.  
573       ActaEcologica Sinica. 2011; 31:5875-5885.
- 574   44. Liu XD, Yu JZ, Zhang XD, Cui WL, Wang JS, Sun LE, Wang YL, Jia SH. The  
575       Secondary Production of Macrozoobenthos in Jiaozhou Bay. Environmental

- 576           Monitoring in China. 2018; 6:47-61.
- 577           <https://doi.org/10.19316/j.issn.1002-6002.2018.06.06>
- 578   45. Jia HB, Hu HY, Tang DB, Huang B, Mao HY. Ecological characteristics of
- 579           macrobenthos community in Zhoushan sea area in spring of 2009. Journal of
- 580           Marine Science. 2012; 1:27-33
- 581   46. Schreck CB, Contreras-Sanchez W, Fitzpatrick MS. Effects of stress on fish
- 582           reproduction, gamete quality, and progeny. In: Reproductive Biotechnology in
- 583           Finfish Aquaculture. Elsevier. 2001.pp. 3-24.
- 584           <https://doi.org/10.1016/B978-0-444-50913-0.50005-9>



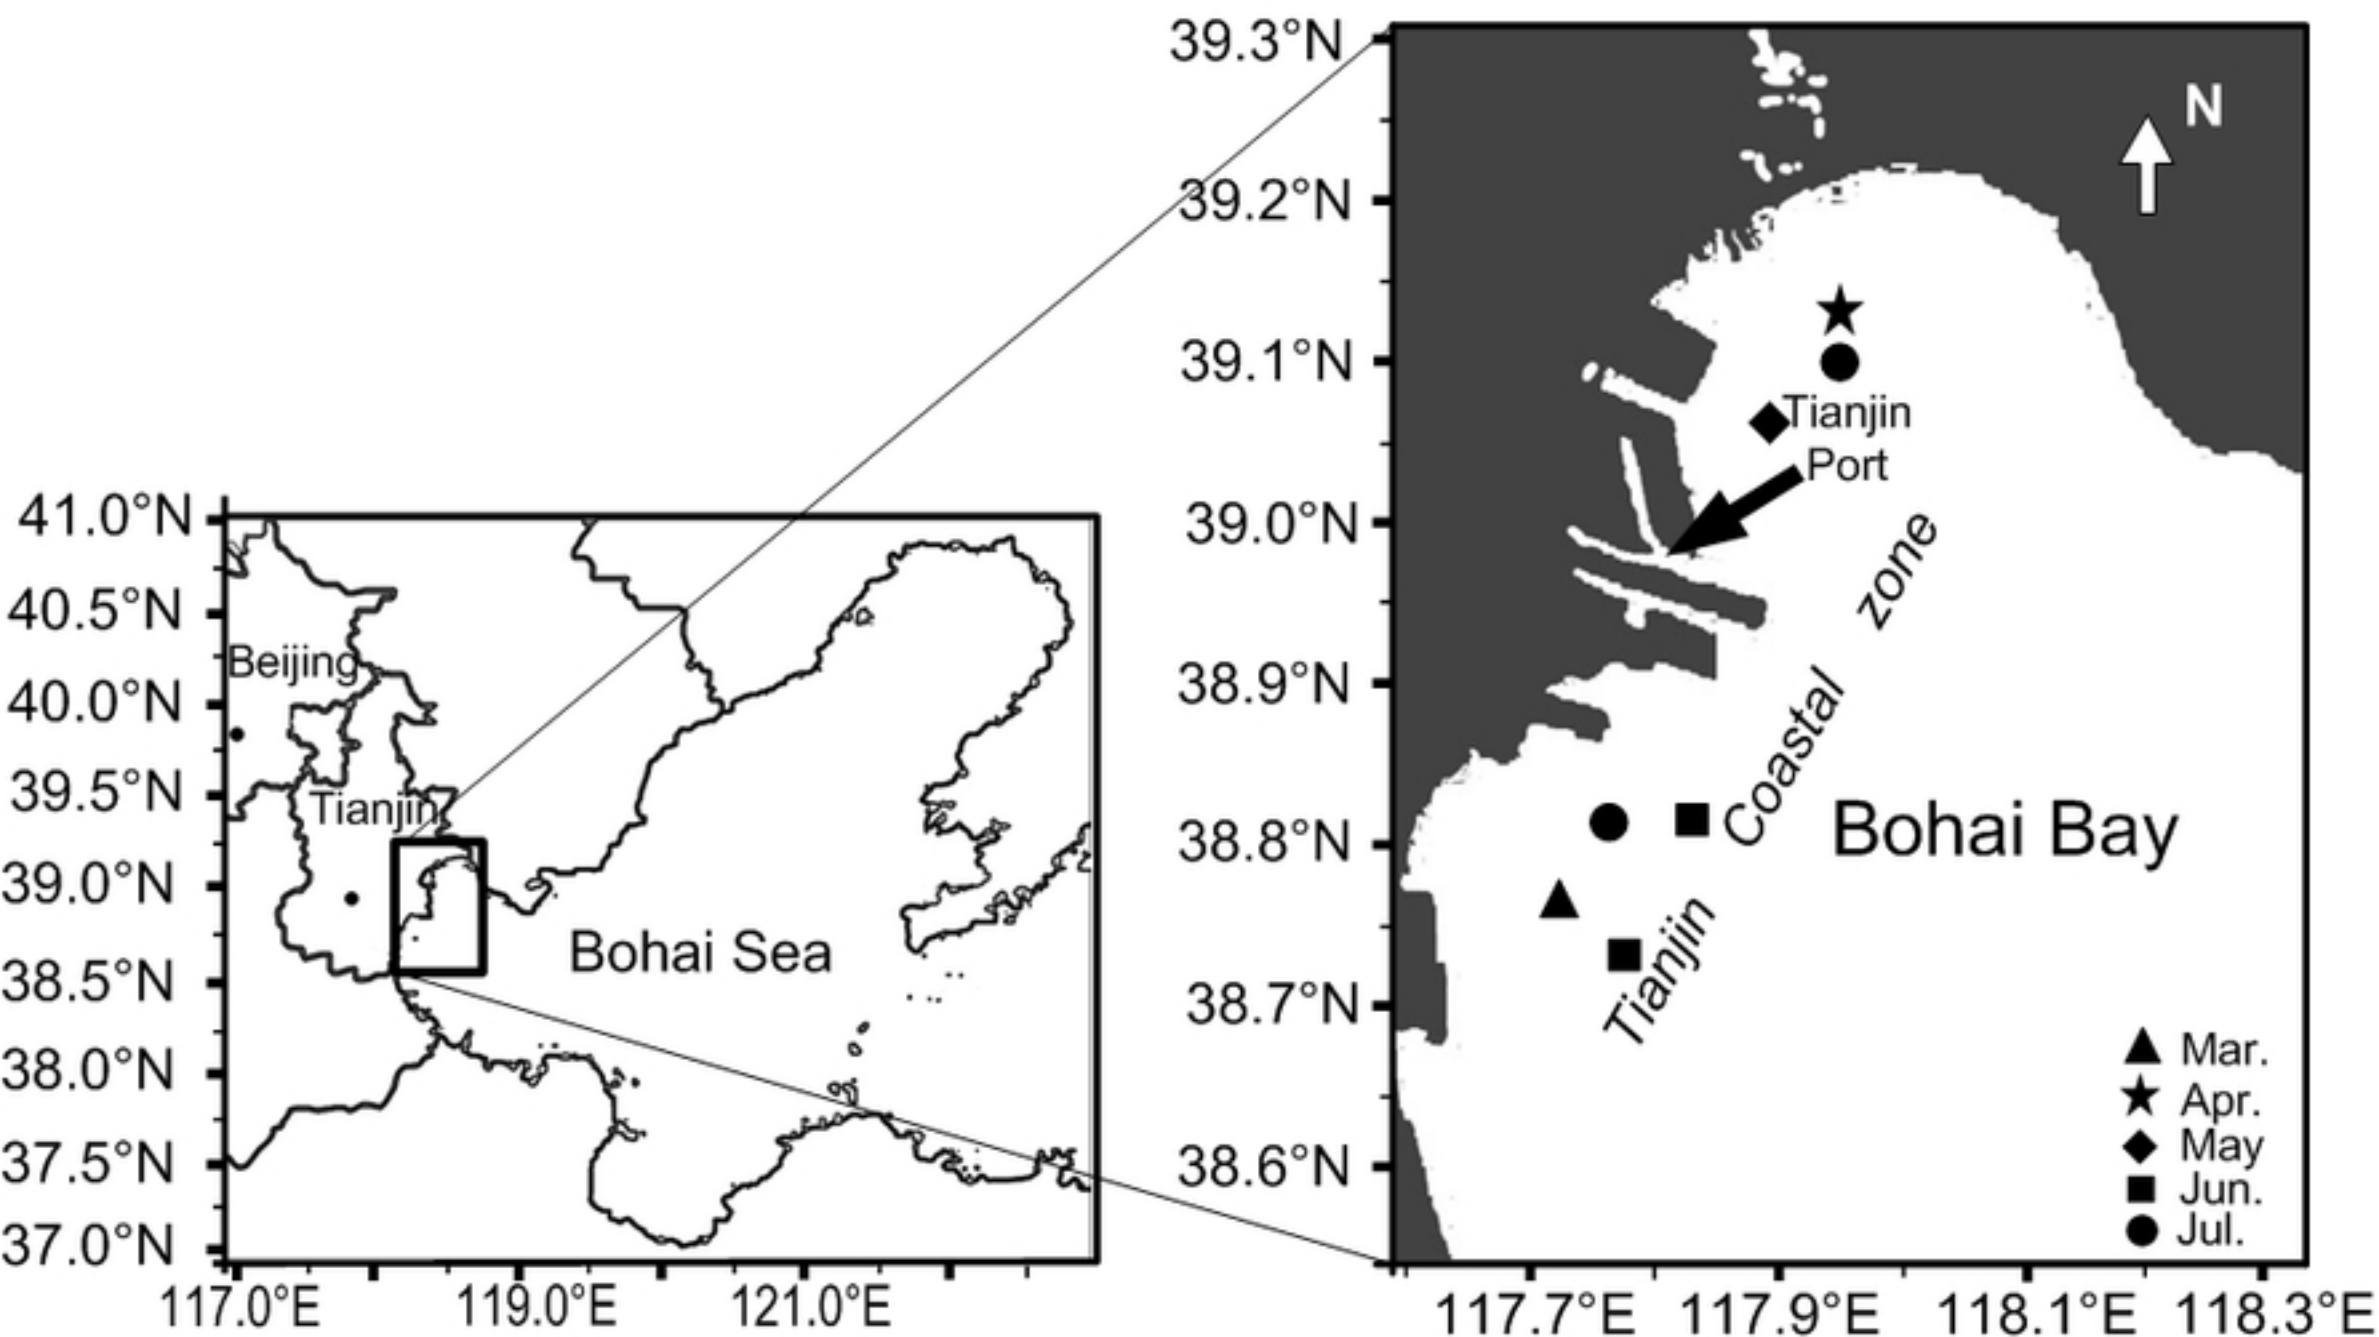

Figure

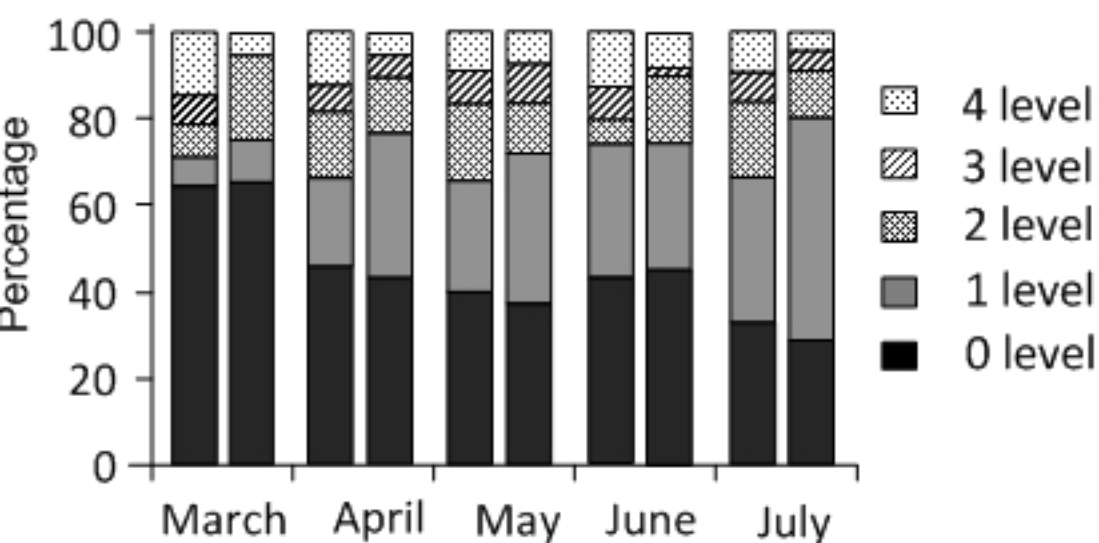

Figure

a

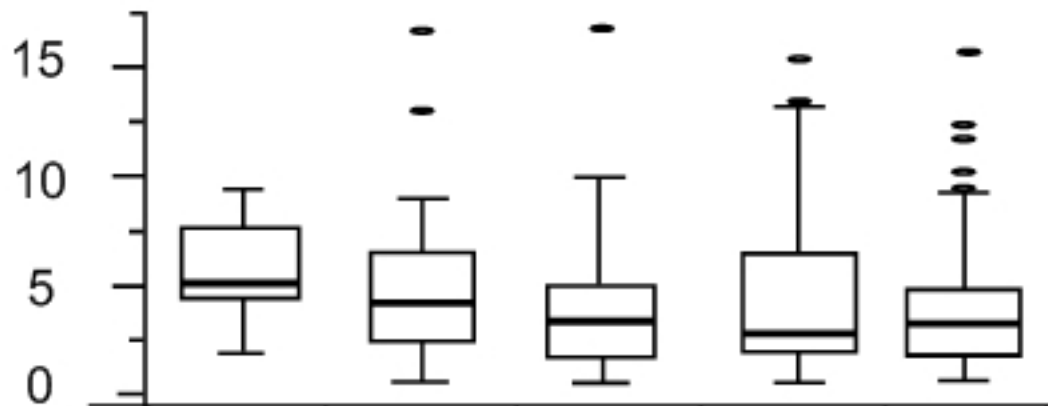

b

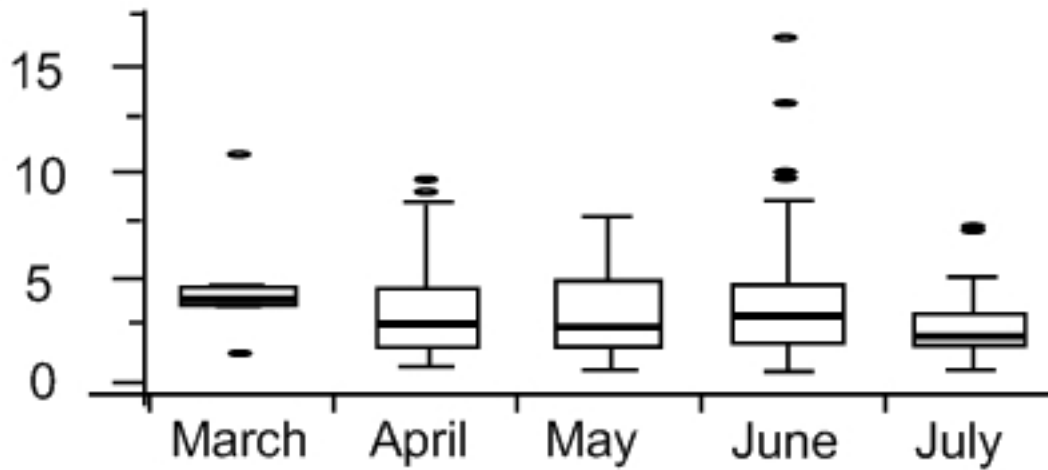

Figure

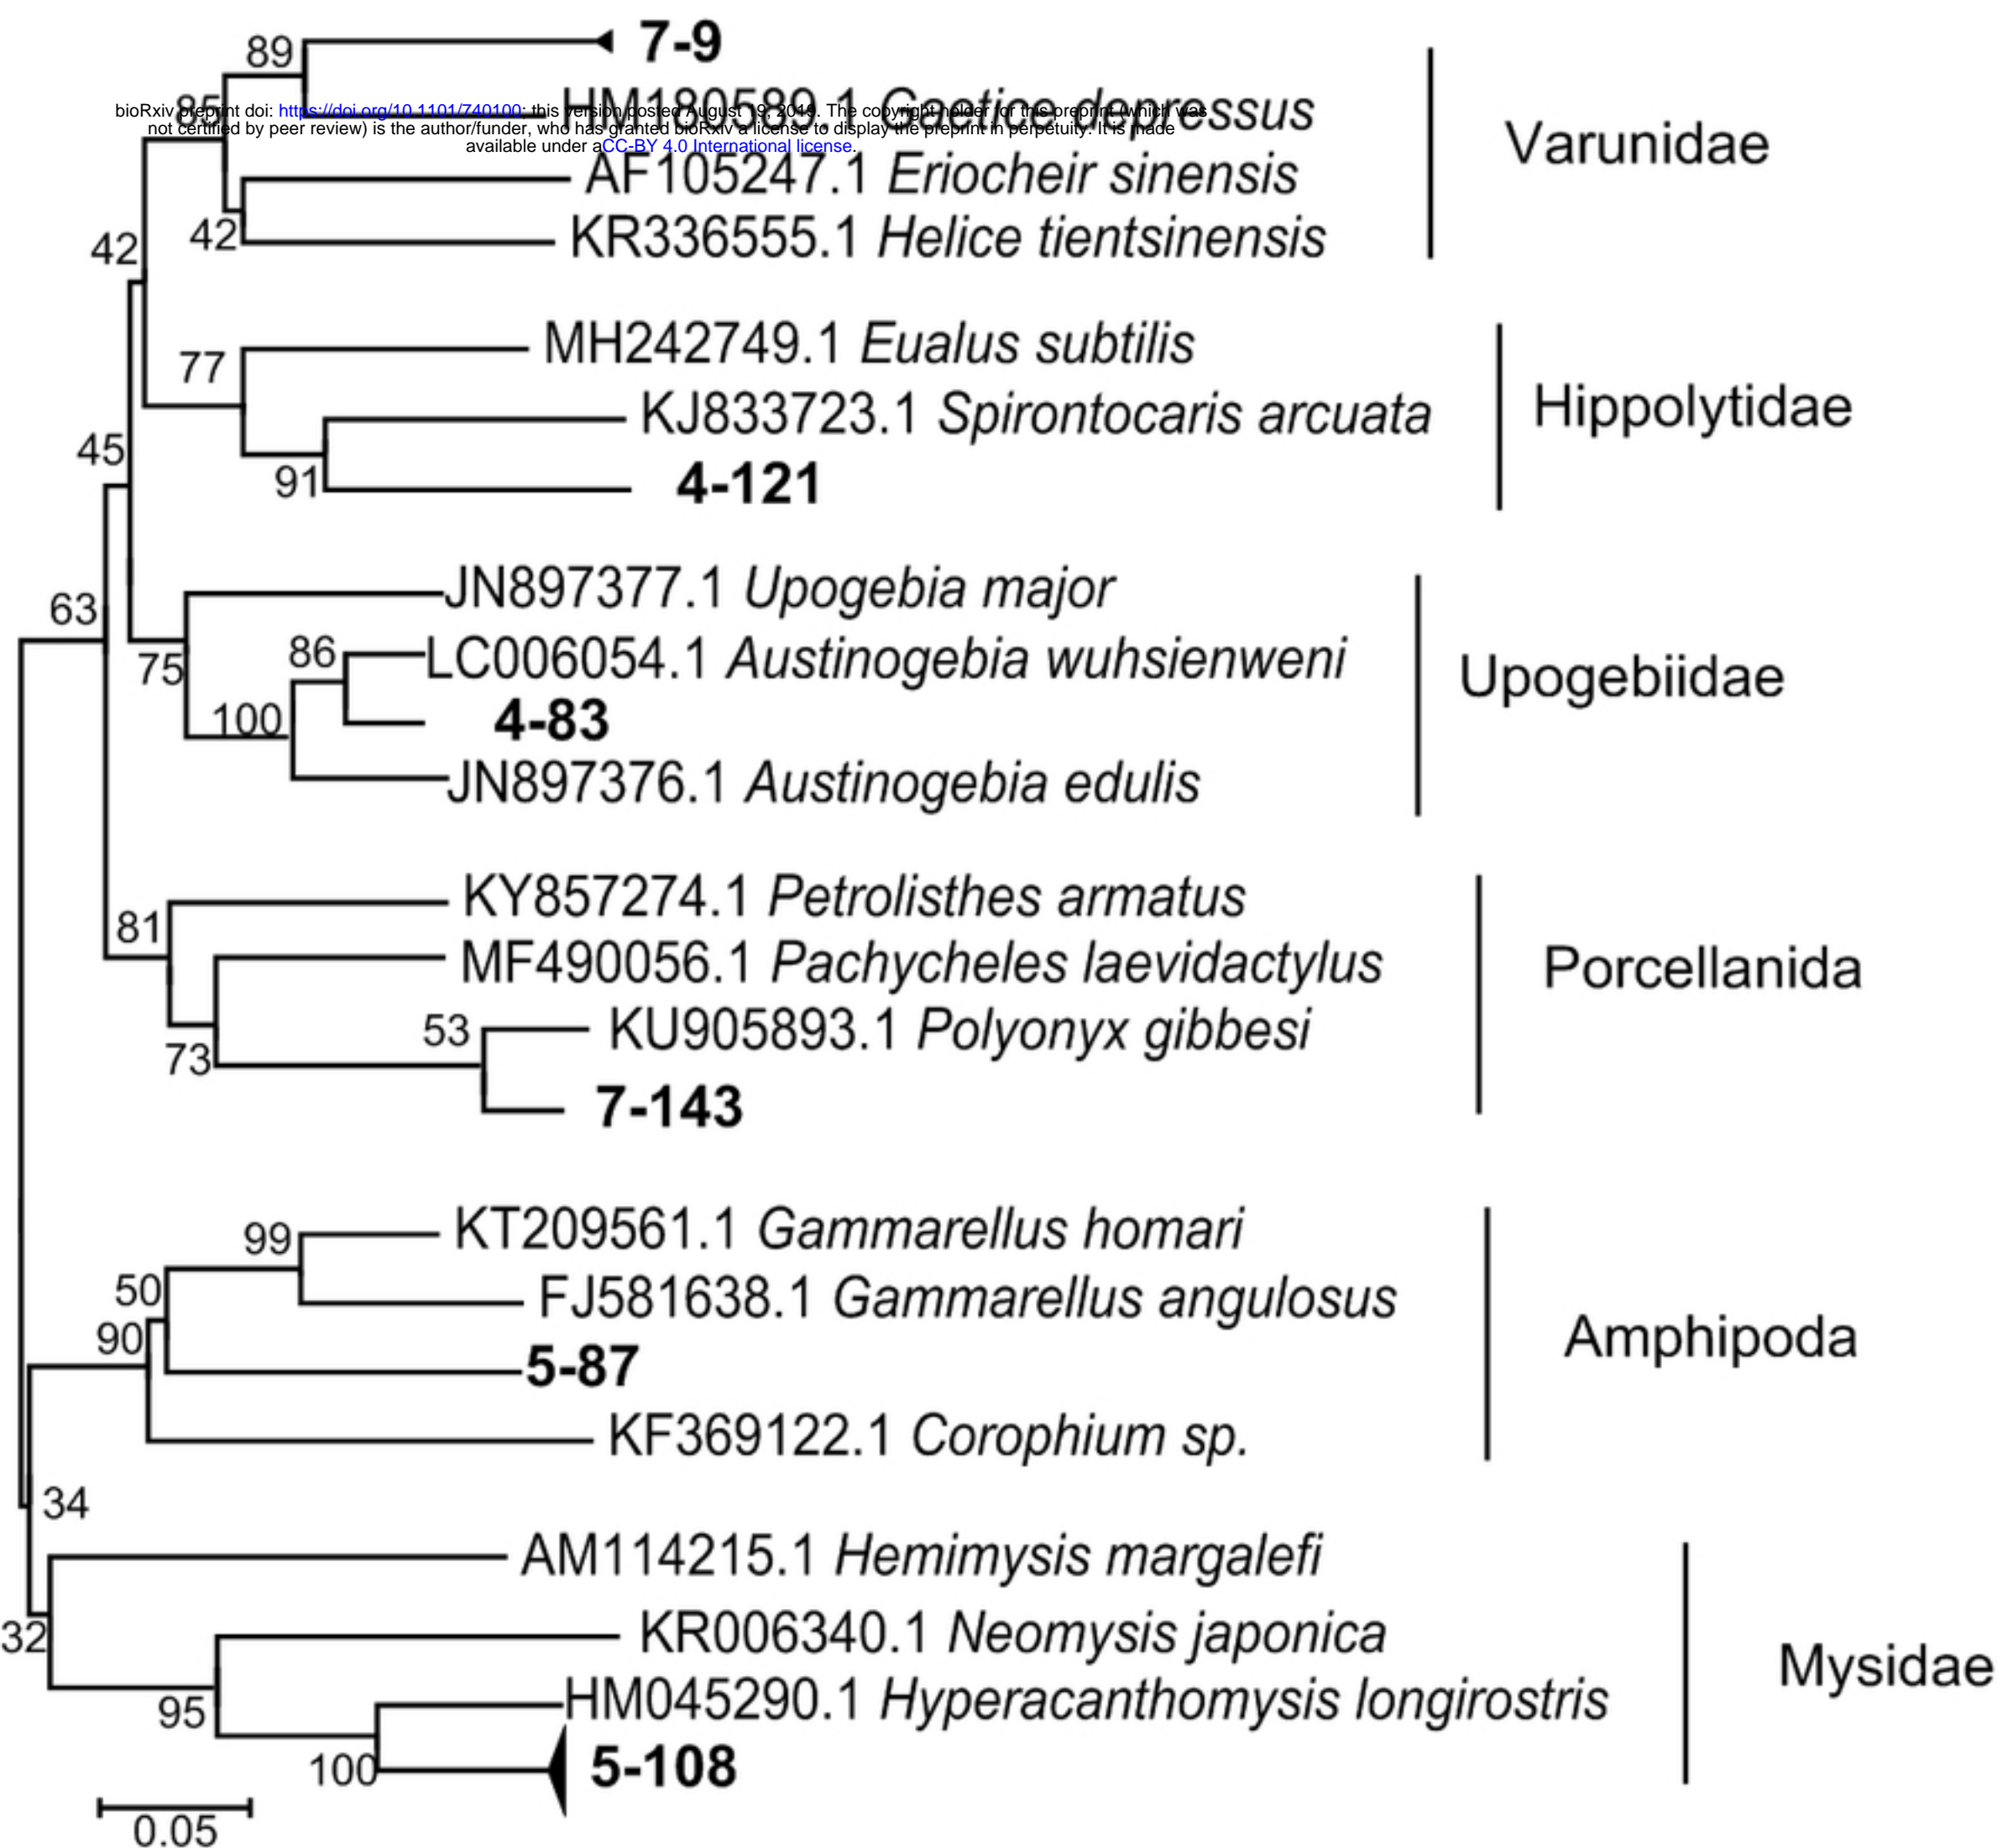

Figure

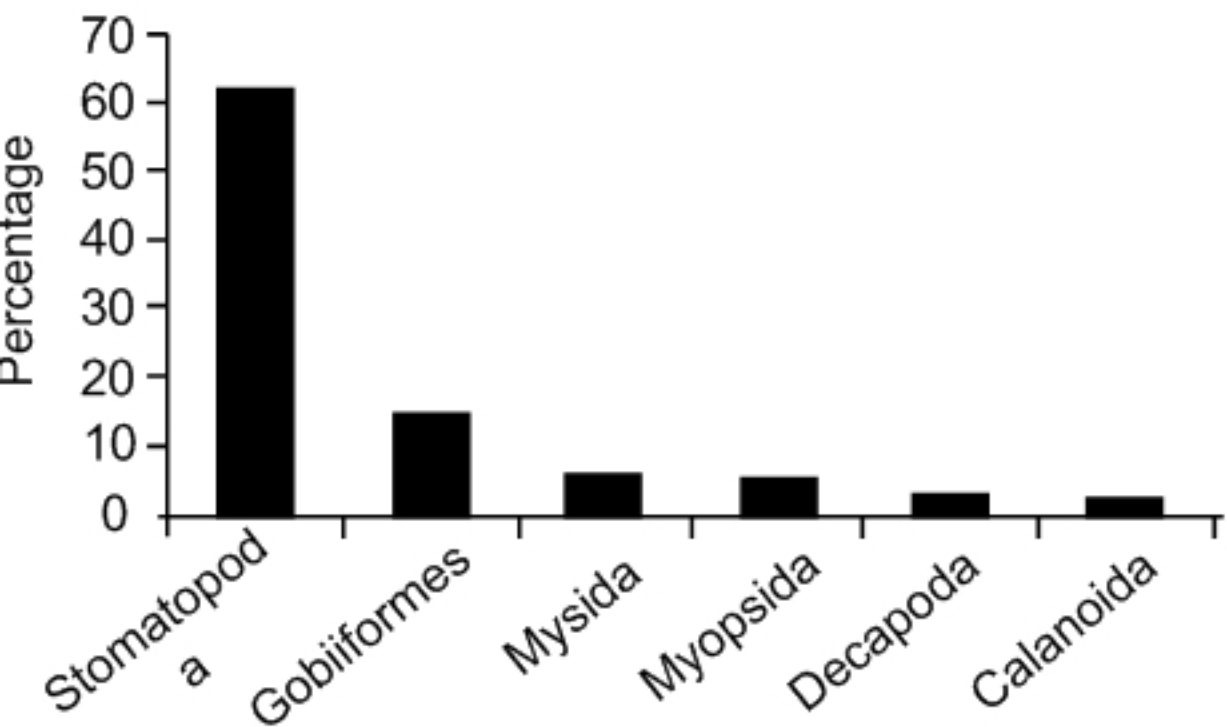

Figure

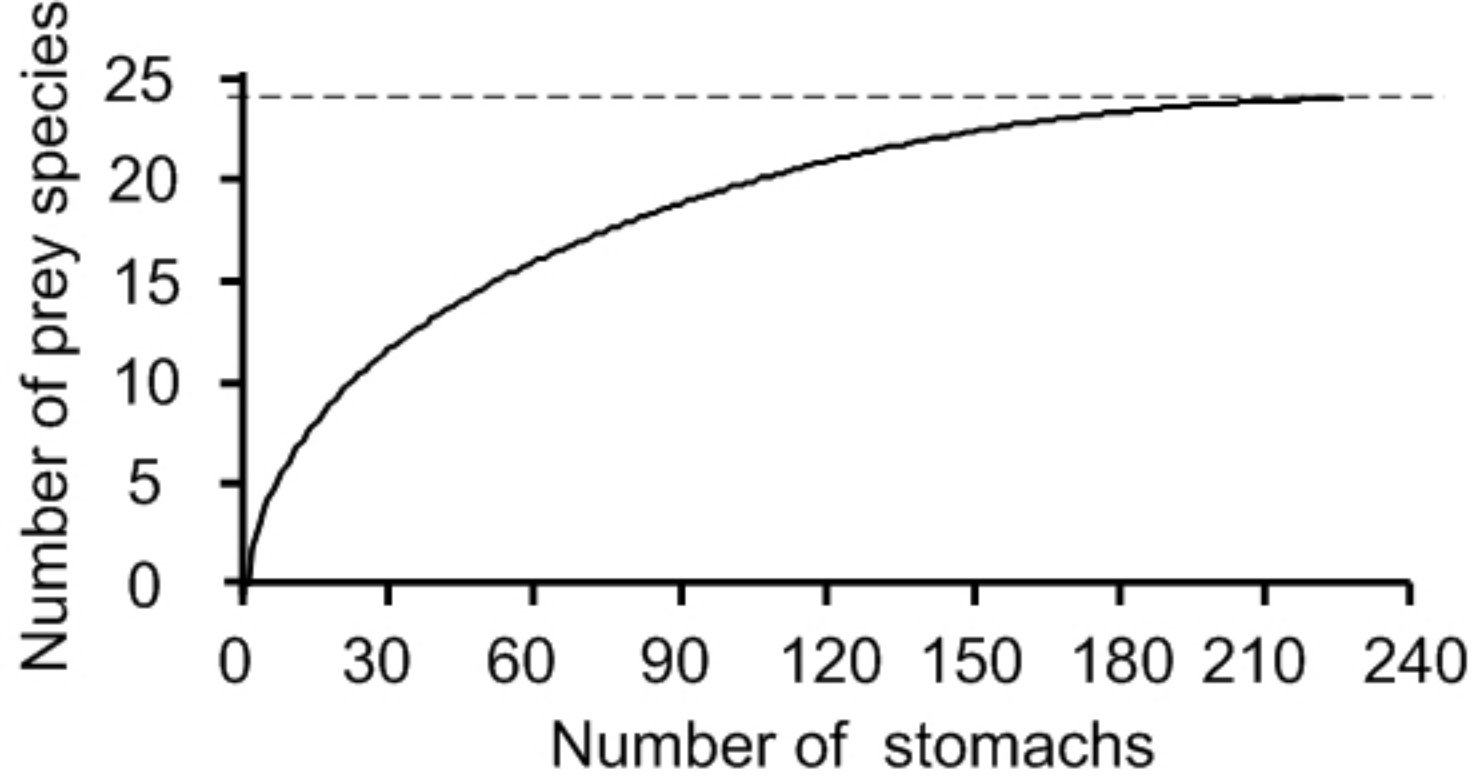

Figure

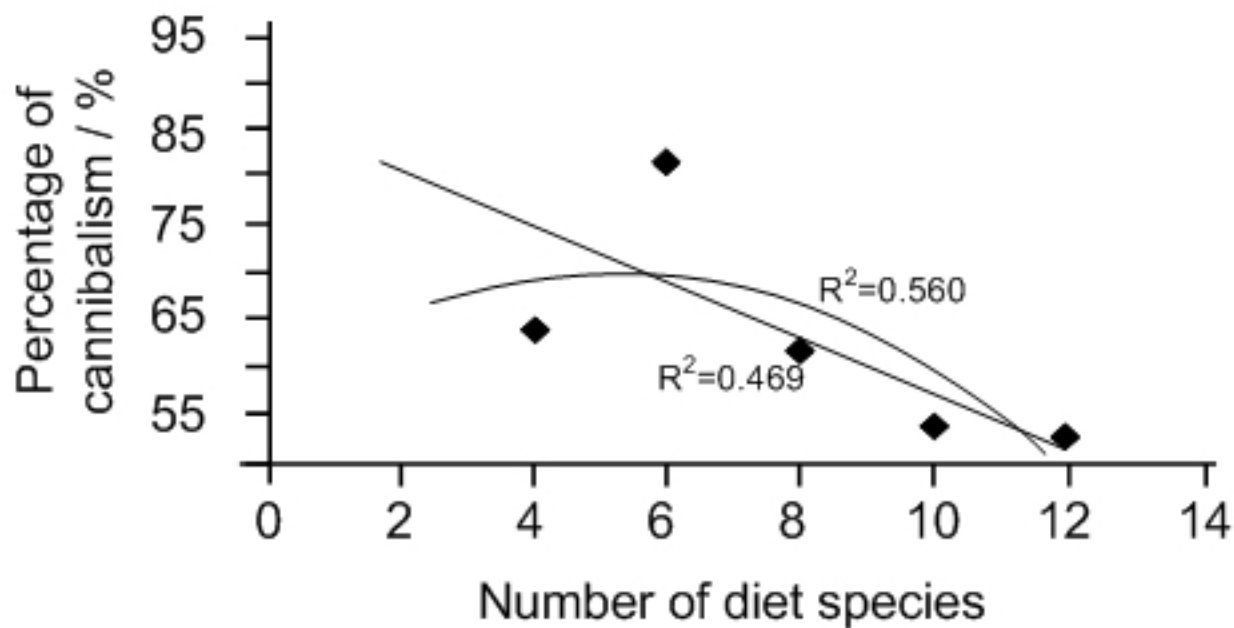

Figure

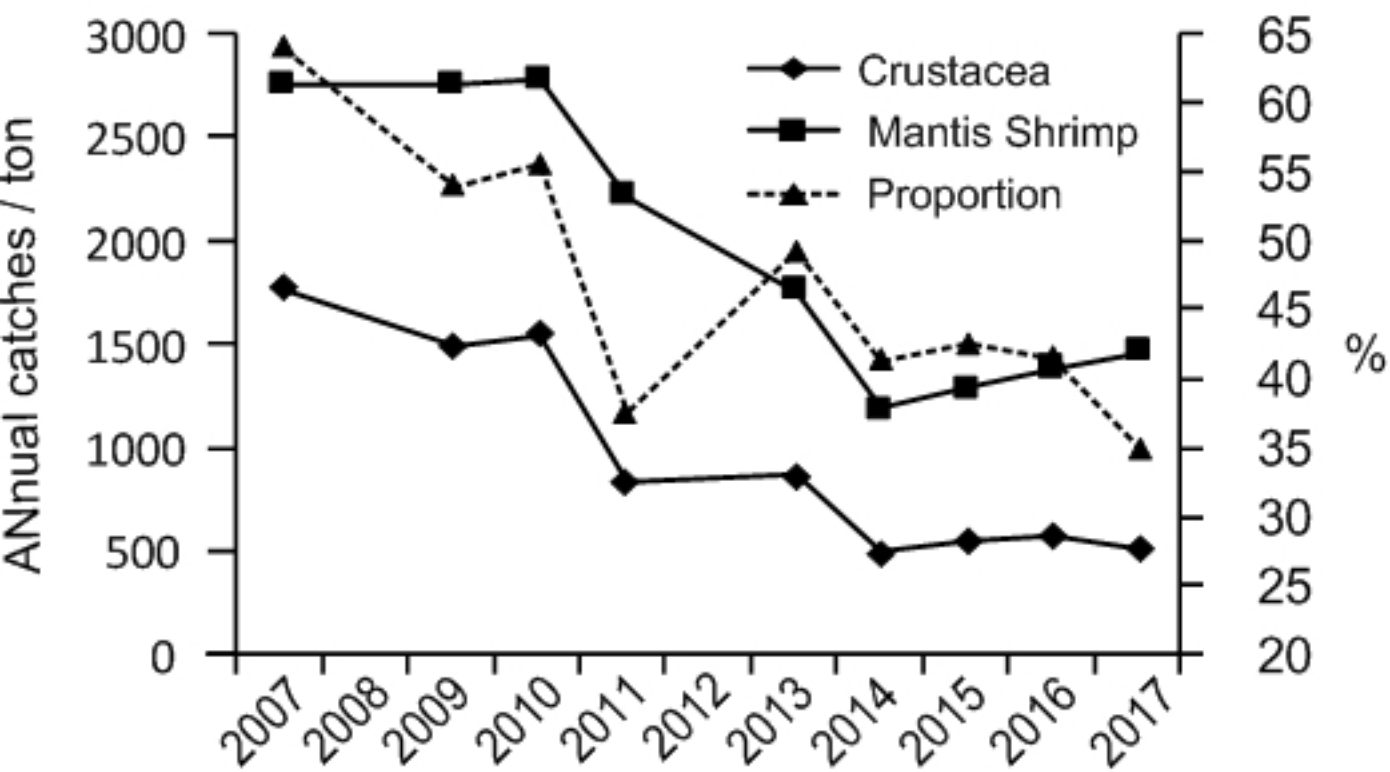

Figure
